## **The spatial position of budding yeast chromosomes affects gene expression**

Francesca Di Giovanni<sup>1,2,\*</sup>, Marco Di Stefano<sup>2,3,\*</sup>, Davide Baù<sup>2,3</sup>, Lucas B. Carey<sup>2</sup>,  
Marc A. Marti-Renom<sup>2,3,4,5</sup> and Manuel Mendoza<sup>1,2,6</sup>

<sup>1</sup>Cell and Developmental Biology Programme, Centre for Genomic Regulation (CRG),  
The Barcelona Institute of Science and Technology (BIST), Barcelona, Spain

<sup>2</sup>Department of Experimental and Health Sciences, Universitat Pompeu Fabra,  
Barcelona, Spain

<sup>3</sup>Structural Genomics Group, CNAG-CRG, The Barcelona Institute of Science and  
Technology (BIST), Barcelona, Spain

<sup>4</sup>Gene Regulation, Stem Cells and Cancer Programme, Centre for Genomic Regulation  
(CRG), The Barcelona Institute of Science and Technology (BIST), Barcelona, Spain

<sup>5</sup>Institució Catalana de Recerca i Estudis Avançats (ICREA), Barcelona, Spain

<sup>6</sup>Institut de Génétique et de Biologie Moléculaire et Cellulaire (IGBMC), CNRS (UMR  
7104), Inserm U964, Université de Strasbourg, Illkirch 67400, France.

*\* These authors contributed equally*

*Correspondence to LBC, MAM-R and MM*

*Contact author address: mendozam@igbmc.fr*

## ABSTRACT

The three-dimensional organization of chromosomes can influence transcription. However, the frequency and magnitude of these effects is still controversial. To determine how changes in chromosome positioning affect transcription across thousands of genes with minimal perturbation, we characterized nuclear organization and global gene expression in budding yeast containing growth-rate neutral chromosome fusions. We used computational modelling and single cell imaging to determine chromosome position and integrated these data with genome-wide transcriptional profiles from RNA sequencing. Chromosome displacement relative to the nuclear periphery has mild but widespread and significant effects on transcription. A 10% decrease in the time a gene spends near the nuclear periphery leads to a 10% increase in gene expression. Our study shows that basal transcriptional activity is sensitive to radial changes on chromosomal position, and provides support for the functional relevance of budding yeast chromosome-level three-dimensional organization in gene expression.

## INTRODUCTION

Chromosomes in interphase nuclei are spatially distributed in a non-random manner. Indeed, chromosomes are organised in distinct structural units and their organisation influences nuclear functions such as transcription, replication and DNA damage repair (reviewed in (Denker and De Laat 2016; Furlan-Magaril et al. 2015; Lemaître and Bickmore 2015; Gibcus and Dekker 2013)). In animal cells individual chromosomes tend to occupy defined nuclear regions termed “chromosome territories” (CT) (Cremer et al. 1982; Haaf and Schmid 1991; Cremer and Cremer 2001; Branco and Pombo 2006). In animal cells, the spatial distribution of CTs can be size- and gene density-dependent; in several cell types, gene-poor chromosomes associate preferentially with the nuclear periphery, whereas gene-rich chromosomes are enriched in the nuclear interior (Croft et al. 1999; Boyle et al. 2001). In addition, distinct structural domains at the sub-chromosomal level have been identified by microscopy, termed chromosomal domains, or CDs (Markaki et al. 2010). Chromosomal domains may correspond to sub-chromosomal units defined by their increased interaction frequencies with each other or with the nuclear lamina. These units are known respectively as topologically associated domains (TADs) and lamina-associated domains (LADs). Gene expression analysis has shown correlation, although not always causation, between these domains and transcription regulation. For example, genes within a TAD tend to correlate their expression levels (Le Dily et al. 2014); TAD borders are associated with actively transcribed loci (Cubéñas-Potts et al. 2017; Wood et al. 2011; Phillips-Cremins and Corces 2013); perinuclear LADs are enriched in silent genes (Guelen et al. 2008), and silent TADs are more likely to be associated with the nuclear periphery (Dixon et al. 2012; Nora et al. 2012; Sexton et al. 2012; Guelen et al. 2008). Notably, individual genes

can display mobility within chromosomal and sub-chromosomal domains, and this has been correlated with changes in their expression level during cell differentiation (Peric-Hupkes et al. 2010). It remains unclear, however, if the position of individual genes within the nucleus affects their expression and/or their ability to be silenced or activated in response to different stimuli, or if these expression-related properties are merely correlated with spatial organization.

Studies in the budding yeast *Saccharomyces cerevisiae* have provided insight into the functional role of nuclear spatial organization (reviewed in (Taddei et al. 2010; Taddei and Gasser 2012; Zimmer and Fabre 2011)). In this organism, chromosome organization is highly stereotypical. The 16 centromeres localize around the spindle pole body (SPB, the equivalent of the animal cell centrosome); whereas the 32 telomeres cluster in 3-8 different foci at the nuclear periphery. Chromosome arms thus extend away from the SPB towards the nuclear periphery where telomeres are anchored, and their specific distribution is linked to their length. Finally, the nucleolus is positioned on the opposite side of the SPB, and is organized around 100-200 repeats of ribosomal DNA located in chromosome XII. Although TADs have been identified in budding yeast and highly transcribed genes are enriched at their boundaries, yeast TADs do not seem to play a major role in coordinating transcription (Eser et al. 2017). However, other aspects of nuclear organization can have an impact in gene expression in budding yeast. On one hand, artificial tethering of reporter genes to subtelomeric regions and to the nuclear periphery can lead to their silencing (Gottschling et al. 1990; Andrulis et al. 1998; Pryde and Louis 1999; Taddei et al. 2009). The association of silent information regulators (SIR) factors with telomeres contributes to perinuclear repression (Taddei et al. 2009). Accordingly, genes within 20 kb from telomeres are poorly expressed, and this depends

at least partially on SIR proteins and telomere anchoring to the nuclear periphery (Wyrick et al. 1999; Taddei et al. 2009). On the other hand, some inducible genes translocate from the nuclear interior to the periphery upon activation, where they interact with nuclear pore complexes (Casolari et al. 2004; 2005; Schmid et al. 2006; Akhtar and Gasser 2007; Taddei et al. 2006). Moreover, artificial targeting of genes to NPCs can also lead to their transcriptional activation (Brickner and Walter 2004; Menon et al. 2005; Taddei et al. 2006). Thus, the yeast nuclear periphery appears to harbor transcriptionally repressing and activating domains. How the three-dimensional organization of the yeast genome shapes global transcription levels remains unexplored.

To study the effect of nuclear organization on transcription in budding yeast, we took advantage of previously described strains bearing Fusion Chromosomes (FCs) (Neurohr et al. 2011; Titos et al. 2014). Here, we show that *FC* strains have a grossly altered nuclear organization in interphase that is not associated with dramatic genome-wide changes in transcription. However, displacement of fusion chromosome genes away from the nuclear periphery does lead to consistent and reproducible changes in expression across a large number of genes; on average a 10% shift away from the nuclear periphery leads to a 10% increase in expression. These results demonstrate that radial chromosome-level spatial organization plays a role in transcriptional regulation in budding yeast. Furthermore, this study demonstrates that *FC* strains are an excellent experimental system in which to test the functional relevance of nuclear organization, and the global role of chromosomal rearrangements on various aspects of cell physiology, such as DNA replication timing and DNA damage repair.

## RESULTS

### **A computational model to study the impact of yeast nuclear organization in gene expression**

To study how the three-dimensional organisation of the genome affects gene expression, we first sought to establish how gene position correlates with transcription levels in wild-type budding yeast cells. To estimate gene position we built computational models of chromosomes in the interphase G1 nucleus, a strategy that has proven useful in recapitulating chromosome-level nuclear organisation in budding yeast (Dultz et al. 2016; Tjong et al. 2012; Wong et al. 2012). We modelled chromosomes as bead-and-spring chains, an approach previously validated for modelling the general physical properties of chromatin fibres (Rosa and Everaers 2008; Di Stefano et al. 2013). Details on the polymer modelling are found in *Materials and Methods* and summarized in **Figure 1A**. Briefly, chromosomes were confined inside a sphere of 2  $\mu\text{m}$  in diameter corresponding to the interphase nuclear size. Centromeres were confined in a spherical region of radius 150 nm at one pole of the nuclear sphere to account for the tethering of centromeres to the spindle pole body by microtubules (O'Toole et al. 1999). The dynamic association of telomeres with the nuclear envelope was modelled with the periphery of the sphere attracting the terminal beads of chromosome chains. Finally, to reproduce the confinement of the rDNA in the nucleolus, the particles corresponding to rDNA were restrained to a region occupying 10% of the total nuclear volume and located at the opposite side of the SPB. An ensemble of chromosomal polymer models was generated using Brownian motion dynamics. A total of 10,000 model conformations satisfying all the imposed restraints were then selected and analyzed for the likelihood of particular loci and chromosomes to be positioned in specific regions of the cell nucleus (**Figure 1B**).

As an orthogonal validation of our model we compared the probability of contact among all chromosomal particles in the wild-type models with the experimentally measured intra- and inter-chromosomal contact frequencies observed by a 3C-derived technique (Duan et al. 2010). In addition, we compared the predicted median telomere-telomere distances from our models with analogous experimental data obtained using imaging (Therizols et al. 2010). In both comparisons, we found that our models, based on the physical properties of chromatin and minimal biological restraints, accurately described the wild-type yeast nuclear organization (**Supplementary Figures 1-2**).

To determine if our computational models could reproduce the experimentally measured low gene expression at the nuclear periphery the predicted gene position relative to the nuclear periphery was correlated with genome-wide mRNA levels obtained by RNA-seq. Genomic regions within 30 kb of the ends of wild type chromosomes are poorly expressed, consistent with previous reports (Wyrick et al. 1999) (**Figure 2A-B**). Importantly, lower expression was also correlated with gene peripheral localisation, as predicted by polymer modelling (**Figure 2A, C**). Because most subtelomeric sequences are also restricted to the perinuclear region, the above analysis confounds the contributions of sequence proximity to chromosome ends (1D effect) and proximity to the nuclear periphery (3D effect) to steady-state mRNA levels. However, we found that, while distance to the telomere and predicted location in the nuclear periphery are correlated, they are imperfectly so (**Figure 2D**). To disentangle 1D and 3D effects we built a linear model that predicts gene expression from codon usage and gene length. We then added to that model either distance to the telomere (1D), or the percent of the time the gene is predicted to

spend in the nuclear periphery (3D). Especially for genes with low expression, the model with the predicted 3D effect outperforms the 1D distance model (**Figure 2 E-F**). Computational models reproduced the low expression levels of perinuclear genes, and modelling suggests that it is localization to the periphery, and not distance from the telomere, that is partially responsible for low expression.

### **Computational modelling and cell imaging validate nuclear reorganisation after chromosomal rearrangements**

To experimentally determine if spatial organization affects expression we next examined how large-scale chromosome rearrangements affect nuclear reorganisation. In previously described Fusion Chromosome (*FC*) strains, up to three "donor" chromosomes were sequentially fused to the end of an intact "recipient" chromosome (Neurohr et al. 2011; Titos et al. 2014). Centromeres were simultaneously removed from donor chromosomes to avoid formation of toxic dicentrics; telomere elements at the site of the fusion were also removed. Thus, like normal chromosomes, Fusion Chromosomes contain two telomeres and one centromere (**Figure 3A-B**). These chromosome fusions only minimally changed the genomic content relative to wild type strains, since only 5 to 26 subtelomeric ORFs are lost during the fusion procedure (**Supplementary Table S1**). However, we hypothesized that *FC* strains would display dramatically altered interphase chromosome organization. Indeed, this is dependent on chromosome number and length, centromere attachment to spindle pole bodies, and telomere anchoring to the nuclear envelope (NE), all of which are altered in *FC* strains. Importantly, chromosome fusions led to a reduction in chromosome and centrosome number from 16 to 13, reduction of telomere number from 32 to 26, and lengthening of the longest chromosome arm



(excluding chromosome XII, containing the variable rDNA array) from 1 to almost 4 Mbp (**Figure 3B**).

We then applied the principles used in modelling wild-type nuclei to determine nuclear organization in the ten different *FC* strains (**Figure 3A-B**). Fusion chromosomes used in this study are named using the following convention: “FC” is followed by the chromosomes that comprise the fusion indicated in brackets, followed by the centromere of the recipient chromosome. Thus, strain *FC(IV:XV:V)CEN4* bears a fusion chromosome in which chromosome IV is the recipient, and chromosomes XV and V are the donors.

The model predicts two major changes in the FC strains. Firstly, large (> 300 nm) displacements of “donor” chromosomes away from the spindle pole body and slight (10-20 nm) displacement of “recipient” chromosomes towards the SPB (**Figure 4** for IV:XII fusions, and **Supplementary Figure 3** for all FCs). Secondly, the model predicts displacement of loci in the fused chromosomes away from the nuclear periphery. To quantify this we computed the distance from the nuclear periphery of all 10-kb loci from the surface of the nuclear sphere for all chromosomes in all strains relative to wild type. The model predicts that >1000 10-kb loci are displaced away from the nuclear periphery while the relative location of loci in non-fused chromosomes never varies by more than 50 nm (**Figure 5A**). Loci with the largest predicted displacement are located near the ends of fused chromosomes (**Figure 5B**).

To validate predicted chromosome displacement in *FC* strains we determined the distance of chromosome loci to each other, to the spindle pole body, and to the nuclear periphery

using fluorescence microscopy in wild-type and *FC* strains. Loci in chromosome IV were visualized through TetR-mRFP and LacI-GFP reporters in cells bearing tetracycline and lactose operator arrays. These arrays were inserted respectively at the *TRP1* locus 10kb from *CEN4* in the right arm of chromosome IV and at the *LYS4* locus in the middle of chromosome IV right arm, 470 kb away from *TRP1* (see scheme in **Figure 6A**). Distances were determined by live cell fluorescence microscopy in G1 cells expressing Spc42-GFP and Nup49-mCherry to label spindle pole bodies and the nuclear periphery, respectively. We found that the *CEN4*-associated *TRP1* locus is located in the vicinity of the SPB in wild-type and *FC(IV:XII)CEN4* nuclei (**Figure 6B-D**), whereas the same locus is displaced away from the SPB in *FC(IV:XII)CEN12* (**Figure 6E**). This is in agreement with model predictions that “donor” chromosomes are displaced away from the SPB, as compared to the wild-type configuration. Neither *TRP1* nor *LYS4* changed their distances from the nuclear periphery in either *FC*, consistent with model predictions. However, immunofluorescence and fluorescent in situ hybridization (IF-FISH) established that the *TEL4R*-proximal locus was closely associated with the nuclear periphery (labelled with a NPC-specific antibody) in wild type cells, whereas the mean distance between *TEL4R* and the nuclear periphery was increased in both *FC(IV:XII)CEN4* and *FC(IV:XII)CEN12* fusions (**Figure 6F**). Because all *FC* strains are derivatives of one of these two fusions, the *TEL4R* region is most likely displaced in these strains as well. This confirmed the model's prediction that subtelomeric loci engaged in a chromosome fusion event are displaced away from the periphery (see **Figure 5A-B**). Together, these results quantitatively confirm the model predictions that chromosome fusions lead to large changes in the sub-nuclear distribution of chromosome regions relative to both the spindle pole bodies and the nuclear periphery.

## **Chromosomal rearrangements cause changes in expression of genes displaced away from the nuclear periphery**

We next asked whether the genome reorganization caused by chromosome fusions led to changes in gene expression. We performed RNA-seq in the ten *FC* strains (see **Figure 3**). Consistent with all *FC* strains having wild-type growth rates (Titos et al. 2014), global gene expression is not perturbed (**Supplementary Figure 4**). We then asked whether changes in expression correlated with changes in predicted gene position relative to the nuclear periphery. To obtain a more accurate value for expression in the absence of changes in nuclear location, for each gene we use the average expression level of that gene across all strains in which the percent peripheral is not predicted to increase or decrease by more than 1%. From this baseline expression value we compared the fold change in expression for each strain with the predicted change in the amount of time that each gene spends in the nuclear periphery. Genes deleted during the fusion events were not considered.

Results of this analysis show widespread and highly significant, but weak, genome-wide expression changes after chromosomal fusions (**Figure 7A**). A 10% increase in the amount of time a gene spends outside of the nuclear periphery results in a ~10% increase in expression (**Figure 7B-C**). While effect on expression is weak, it is consistent across changes in localization and strains (**Figure 7B-C**).

Notably, genes with changes in both expression and localisation were concentrated around subtelomeric regions of chromosomes engaged in fusion events, which models predict are the regions undergoing major displacement in *FC* strains. Examples of

correlated changes in expression and localisation are shown for the *TEL4R*-proximal region, which is perinuclear in wild-type cells but is displaced away from the nuclear periphery in *FC(IV:XII)*, and presumably in all other *FC* strains, as they are derivatives of *FC(IV:XII)* (see **Figure 3**). Most genes in the *TEL4R*-proximal region show increased expression after displacement towards the nuclear interior (**Figure 7D**). These results establish that spatial displacement away from the nuclear periphery is sufficient to alter expression levels of subtelomeric genes.

## DISCUSSION

Interphase yeast chromosomes are organized with centromeres clustering around the spindle pole body (SPB), telomeres associating with the nuclear envelope (NE), and chromosome arms extending between these two anchoring points in a brush-like fashion. How this organization affects nuclear functions is not fully understood. Previous studies reported altered expression of subtelomeric genes in mutants that disrupt heterochromatin formation or telomere clustering (Wyrick et al. 1999; Taddei et al. 2009). Importantly, these studies did not directly address the role of three-dimensional chromosome organisation, as the genetic perturbations used (depletion of histone H4, and mutations of the silencing factor *SIR3* and of the telomere tethering proteins *YKU70* and *ESCI*) affected multiple processes, including heterochromatin formation, genome-wide gene expression and DNA repair. In this study, we used tailored chromosome fusions (*FC* cells) to alter interphase nuclear organization in otherwise wild-type cells. Computational modelling validated with single cell imaging revealed significant changes in nuclear organisation after these chromosome fusion events. This highlights the power of polymer-based modelling approaches to reproduce chromosome-level organization of wild type yeast nuclei, and to predict the reorganization caused by chromosome rearrangements,

based only on minimal imposed constraints. Importantly, our analysis revealed that although genome-wide gene expression levels remained generally unaffected by changes in chromosome organization, subtelomeric loci showed changes in mRNA levels that were correlated with their displacement. This directly demonstrates the impact of three-dimensional nuclear organisation in gene expression in budding yeast.

Consistent with normal growth of *FC* strains in rich media (Titos et al. 2014), the gene expression programs of *FC* cells remain largely unperturbed. However, displacement away from the periphery does result in consistent and reproducible increases in expression across, with over 100 genes exhibiting a mild but significant increase. These results support the view that, while 3D nuclear architecture does matter in yeast, cis-acting elements such as promoter sequences, and the local chromatin environment, dominate over spatial location in setting transcription levels.

It is interesting to consider these results in the context of previous studies on the mechanisms of subtelomeric silencing. Transcription levels are known to decrease in proximity to telomeres (reviewed in (Mondoux and Zakian 2005)). Moreover, gene targeting to the nuclear periphery, either by integration of reporters in subtelomeric regions or by artificial anchoring to perinuclear proteins, leads to silencing that is dependent on perinuclear enrichment of SIR factors (Gottschling et al. 1990; Andrulis et al. 1998; Pryde and Louis 1999; Taddei et al. 2009). These observations led to the hypothesis that the nuclear envelope is a transcriptionally repressive environment due to the local accumulation of repressive factors. However, a truncated telomere that does not localize to the nuclear periphery can still support silencing of a *URA3* reporter (Mondoux

et al. 2007), and microarray analysis showed that almost 80% of subtelomeric genes were still silenced after telomere detachment from the nuclear periphery in *esc1 yku70* mutants (Taddei et al. 2009). These findings raised the possibility that subtelomeric gene position and expression are largely independent from each other. Our results demonstrate that displacement from the nuclear periphery affects the expression levels of native subtelomeric genes, but that this effect is relatively mild, which may have escaped previous analysis using growth on selective media or microarrays. These findings support the hypothesis that regulation of perinuclear localisation of subtelomeric genes (e.g. by telomere detachment) may affect their expression in response to environmental signals.

In summary, the data presented here establish that *LC* strains are an excellent tool to study the relationship between nuclear organization and function without resorting to mutations, which may have unintended effects, and demonstrate that chromosome position plays a role in determining gene expression levels for more than 100 native genes in cells lacking any silencing or tethering defects. It remains to be seen whether other nuclear processes such as DNA replication timing and DNA damage repair are affected by changes in nuclear organization.

## **Materials and methods**

**Polymer modelling.** Each yeast chromosome of wild type and fused chromosome strains was modelled using a bead-and-spring polymer model previously used and validated for modelling chromatin fibers (Rosa and Everaers 2008). This model consists of 3 different energy contributions each describing a general physical property of the chain:

- 1 – Excluded volume (Purely repulsive Lennard-Jones potential). Each particle occupies a spherical volume of diameter equal to 30nm and cannot overlap with any other particle in the system. Considering the typical compaction ratio of the chromatin fiber in yeast (Bystricky et al. 2004; 2005), each particle contains about 3.2 kb of DNA.
- 2 – Chain connectivity (Finite extensible nonlinear elastic potential). Consecutive particles on the chain are connected with an elastic energy, which allows a maximum bond extension of 45 nm. The simultaneous action of the excluded volume and the chain connectivity prevents chain crossings.
- 3 – Bending rigidity (Kratky-Porod potential). The bending properties of an ensemble of polymer chains is usually described in terms of the *persistence length*, which is the length-scale where the chain changes its behaviour from rigid to flexible. According to the bending properties experimentally measured for the yeast chromatin fiber (Cui and Bustamante 2000; Bystricky et al. 2004; Langowski 2006), the persistence length of each model chain was set to 61.7 nm for internal regions of the chromosomes, and to 195.0 nm for the terminal ones. The regions of the chains corresponding to the telomeres (the 20 kb at the chromosomes ends), in fact, are more compact and rigid (Dekker 2008).

Since the modelling aims to describe the chromosomal configuration of haploid strains, the total number of beads in the system is 4,062, resulting from the presence of one copy of each yeast chromosome (**Supplementary Tables S2-S3**). Each chromosome is initially folded in a solenoidal arrangement, where a rosette pattern is repeatedly stacked to yield an overall linear, rod-like conformation, see **Figure 1** (Rosa and Everaers 2008; Di Stefano et al. 2013; 2016).

The chromosome chains are consecutively placed inside a sphere of radius 1.0 centered in the origin (0,0,0). This sphere describing the typical shape of the yeast nucleus in G1, according to imaging data, interacts with the chromosome particles as a rigid wall. To obtain the initial chromosome nuclear locations, the position of the chromosome centres is picked in a random, uniform way inside the nucleus, and the orientation of the rod axis is chosen randomly. The iterative placement proceeds from the longest to the shortest chromosome in a way that the newly added chromosomes must not clash with previously placed ones. In case of a clash, the placement attempt is repeated. Next, the following biological restraints (i-iii) are satisfied using a short preliminary run of Langevin dynamics, spanning  $60\tau_{LJ}$ , where  $\tau_{LJ}$  is the Lennard-Jones time and is used as the time unit in LAMMPS:

(i) To simulate the tethering of the centromeres to the spindle pole body (SPB), the motion of the centromeres particles was restrained into a spherical compartment of radius  $R_{SPB}=150$  nm centered in  $c_{SPB}=(-850,0.0,0.0)$ .

(ii) rDNA particles was restrained to a region occupying 10% of the total nuclear volume and located at the opposite side of the SPB, to simulate the nucleolus. This region is defined by the intersection of the nuclear sphere with a sphere of radius  $R_{NUCL}=640.92$  nm whose center is located at  $c_{NUCL}=(1000,0.0,0.0)$ . Conversely, the other no-rDNA particles of the chromosome models are restrained to stay out of the same nucleolar compartment.

(iii) Finally, to represent the tendency of the telomeres to stay anchored to the nuclear envelope (NE), the periphery of the sphere (a shell within  $R_{PER}=126$  nm from the nuclear envelope which accounts for one third of the nuclear volume) is attracting for the terminal



particles of the chromosome chains. This effect, unexplored so far, was accomplished using a Lennard-Jones attraction (Jones 1924).

The restraints (i) to (iii) are imposed applying on each of the involved particles a force  $F$ , only when the particle do not satisfy the confinement conditions, using the option `indent` of the software LAMMPS (Plimpton 1995):

$$F(r) = - 10(r - R)^2,$$

where  $r$  is the distance from the particle to the center of the sphere, and  $R$  is the radius of the sphere.

In the *FC* strains, the chromosomes involved in the fusion are attached to each other using additional connectivity bonds (points 2 above) between the telomeres involved in the fusion process. These telomeres, which are attracted to the periphery in the wild type strain models, behave as internal chromosomal sequences in the *FCs* strains, and lost the telomeric attraction to the nuclear envelope.

Finally, the system is relaxed using a run of Langevin dynamics of  $30,000\tau_{LJ}$ , and one conformation every  $3,000\tau_{LJ}$  (10 models per trajectory) is retained for analysis. Replicating the complete simulation 1,000 times generates 10,000 genome-wide conformations per strain.

**Strains, cell growth and live cell microscopy.** *Saccharomyces cerevisiae* strains are derivatives of S288c. TetO/LacO cells and chromosome fusions were previously

described; briefly, haploid cells were transformed with a PCR fragment encoding a selection cassette flanked by sequences with homology to subtelomeric regions (Neurohr et al. 2011, Titos et al. 2004). Live-cell microscopy was carried out with a Leica imaging system (AF6000). All live-cell images were acquired at 30°C with a ×100 objective lens. Eleven 0.2 μm thick z-sections were collected. Distances were measured between local maxima on single planes using ImageJ (<http://rsb.info.nih.gov/ij/>) and Microsoft Excel although for clarity, figures are represented as 2D maximum projections of whole-cell Z-stacks. Graphs and statistical analysis (*t*-test allowing for unequal variance) were performed with R and Excel (Microsoft).

**Immunofluorescence and fluorescence in situ hybridisation (IF-FISH).** To make FISH probes, a 6 kb PCR fragment in the *TEL4R* region was amplified from genomic DNA with primers:

(5'-ATCTTTCCTTACACATAAACTGTCAAAGGAAGTAACCAGG-3') and  
(5'-GTAACATACAAACTCAACGCCTACTAAGATTAATAACATCA-3'),

and labelled with Alexa Fluor 488 by nick translation using the FISH Tag-DNA Multicolor Kit (Invitrogen). FISH-IF was performed essentially as described (Gotta et al. 1999), with minor modifications. Overnight cultures ( $1-2^{10}$  cells/ml) were treated with 10 mM DTT in 0.1 M EDTA/KOH, pH 8.0, treated with 0.4 mg/ml Zymolyase 100T (Seikagatu) for 15 min at 30°C in YPDA medium containing 1.1 M sorbitol (YPDA-S). This treatment allowed the cells not to be completely converted into spheroplasts, but partially retained their cell walls, to help stabilize their three-dimensional structure. Partially spheroblashed cells were fixed for 20 min with 3.7% paraformaldehyde in YPD-S at room temperature. Cells were recovered by centrifugation (1000 g for 5 min), washed three times in YPD-S, resuspended in YPDA, spotted on Teflon slides, left to air-dry for 5 min, then immersed in methanol for 6 min and in acetone for 30 s at 20°C. Slides were

then rinsed in a phosphate-buffered saline containing 0.1% Triton X-100 (PBS-T) and 1% ovalbumin, incubated overnight at 4°C (or for 1 h at 37°C) with anti-Nuclear Pore Complex Proteins antibody [Mab414] - CHIP Grade (ab24609), diluted 1:2 in PBS-T. Slides were then washed in PBS-T and incubated with preabsorbed Cy5 AffiniPure Goat Anti-Mouse IgG (H+L) diluted to 0.025 mg/ml in PBS-T at 37°C for 1 h. Next, slides were fixed again in PBS containing 3.7% freshly paraformaldehyde for 20 min and incubated overnight in 4x SSC, 0.1% Tween 20, 20 µg/ml of RNase A at room temperature. Slides were then washed in water, sequentially immersed for 1 min in 70, 80, 90, and 100% ethanol at -20°C, and air-dried. Slides were then denatured at 72°C with 70% formamide and 2 SSC, immersed for 1 min sequentially in 70, 80, 90, and 100% ethanol at -20°C and air-dried. The hybridization solution (50% formamide, 10% dextran sulfate, 2x SSC, 0.05 mg/ml labeled probe, and 0.2 mg/ml single-stranded salmon sperm DNA) was then applied and slides were incubated at 10 min at 72°C. Slides were incubated for 48 h at 37°C to allow probe hybridization, washed twice for 10 min each at 42°C in 0.05x SSC and twice in BT buffer (0.15 M NaHCO<sub>3</sub>, 0.1% Tween 20, pH 7.5) with 0.05% BSA for 30 min. After three washes in BT buffer, slides were mounted in 1x PBS, 80% glycerol, 24 µg/ml 1,4-diazabicyclo-2,2,2-octane, pH 7.5. Images from IF-FISH were acquired on a confocal microscope (Leica TCS SPE) with a ×100 objective.

**RNA-seq.** Cells were harvested by centrifugation and RNA was extracted from fresh pellets using the RiboPure Yeast Kit (Ambion). RNA concentrations were determined using a NanoDrop 1000 (Thermo Scientific), while quality and integrity was checked using a Bioanalyzer 2100 (Agilent Technologies). RNA-seq was performed on a HiSeq2000 (Illumina). Paired-end reads of 50 bp were aligned to the reference *S.*

*cerevisiae* genome (R64-1-1) using using kallisto quant -i orf\_coding\_all.idx -o output -b 100 read1\_file.fastq.gz read2\_file.fastq.gz.

To obtain a robust and accurate wild-type expression level for each gene, we averaged across strains. For each strain in which the gene is predicted to increase or decrease time spent in the nuclear periphery by less than 1% we took the median expression value across all strains (four independent RNA-seq replicate experiments per strain). Fold-change in expression was calculated as the log<sub>2</sub> ratio of expression in the *FC* strain divided by expression in this median expression value. Similar results are obtained if expression for the wild-type control strain are used, but as many of the genes are expressed at very low levels, and hence represented by very few reads, averaging across strains is more robust to random counting noise.

**Linear model to predict gene expression.** To determine if predicted % peripheral or 1D sequence distance from the telomere is more predictive of gene expression we built a linear model to predict gene expression (median T.P.M. across all biological replicates of the wild type strain 409). We first built a linear model (all code is on github) using ORF length, codon bias, frequency of optimal codons, and codon adaptation index as predictors (downloaded from

[https://downloads.yeastgenome.org/curation/calculated\\_protein\\_info/protein\\_properties\\_README](https://downloads.yeastgenome.org/curation/calculated_protein_info/protein_properties_README)).

We next built two additional models, one with the above features plus predicted % peripheral, and one with the above features plus distance from the telomere, as measured

in nucleotides. We calculated  $r^2$  for all three models. The average increase in  $r^2$  is identical with 10-fold cross validation.

**Data accessibility.** Data and code are available at

[https://github.com/Lcarey/DiGiovanni\\_DiStefano\\_FC](https://github.com/Lcarey/DiGiovanni_DiStefano_FC)

and RNA-seq raw data are available as GEO accession Nr GSE108261 at

<https://www.ncbi.nlm.nih.gov/geo/query/acc.cgi?acc=GSE108261>

## **Acknowledgements**

We thank Guillaume Filion and all members of the Mendoza lab for comments, and the CRG Genomics Unit for assistance with RNA sequencing. M.M. acknowledges support of the European Research Council Starting Grant 2010-St-20091118 and the Spanish Ministry of Economy and Competitiveness BFU2012-37162. L.B.C. was supported by Agència de Gestió d'Ajuts Universitaris i de Recerca (2014 SGR 0974) and the Spanish Ministerio de Economía y Competitividad and FEDER (BFU2015-68351-P). M.A.M-R was supported by the European Research Council under the 7th Framework Program FP7/2007-2013 (ERC grant agreement 609989), the European Union's Horizon 2020 research and innovation programme (grant agreement 676556) and the Spanish Ministry of Economy and Competitiveness (BFU2013-47736-P). We also acknowledge support from 'Centro de Excelencia Severo Ochoa 2013-2017', SEV-2012-0208 to the CRG.

**Author Contributions:** MMR & MM conceived the project. FDG performed experiments. DB and MDS performed simulations. MDS and LBC analyzed the data. MM and LBC wrote the manuscript, with input from all authors.

## References

- Akhtar A, Gasser SM. 2007. The nuclear envelope and transcriptional control. *Nat Rev Genet* **8**: 507–517.
- Andrulis ED, Neiman AM, Zappulla DC, Sternglanz R. 1998. Perinuclear localization of chromatin facilitates transcriptional silencing. *Nature* **394**: 592–595.
- Boyle S, Gilchrist S, Bridger JM, Mahy NL, Ellis JA, Bickmore WA. 2001. The spatial organization of human chromosomes within the nuclei of normal and emerin-mutant cells. *Hum Mol Genet* **10**: 211–219.
- Branco MR, Pombo A. 2006. Intermingling of chromosome territories in interphase suggests role in translocations and transcription-dependent associations. *PLoS Biol* **4**: e138.
- Brickner JH, Walter P. 2004. Gene recruitment of the activated INO1 locus to the nuclear membrane. *PLoS Biol* **2**: e342.
- Bystricky K, Heun P, Gehlen L, Langowski J, Gasser SM. 2004. Long-range compaction and flexibility of interphase chromatin in budding yeast analyzed by high-resolution imaging techniques. *Proc Natl Acad Sci USA* **101**: 16495–16500.
- Bystricky K, Laroche T, Van Houwe G, Blaszczyk M, Gasser SM. 2005. Chromosome looping in yeast: telomere pairing and coordinated movement reflect anchoring efficiency and territorial organization. *The Journal of Cell Biology* **168**: 375–387.
- Casolari JM, Brown CR, Drubin DA, Rando OJ, Silver PA. 2005. Developmentally induced changes in transcriptional program alter spatial organization across chromosomes. *Genes & Development* **19**: 1188–1198.
- Casolari JM, Brown CR, Komili S, West J, Hieronymus H, Silver PA. 2004. Genome-wide localization of the nuclear transport machinery couples transcriptional status and nuclear organization. *Cell* **117**: 427–439.
- Cremer T, Cremer C. 2001. Chromosome territories, nuclear architecture and gene regulation in mammalian cells. *Nat Rev Genet* **2**: 292–301.
- Cremer T, Cremer C, Schneider T, Baumann H, Hens L, Kirsch-Volders M. 1982. Analysis of chromosome positions in the interphase nucleus of Chinese hamster cells by laser-UV-microirradiation experiments. *Hum Genet* **62**: 201–209.

- Croft JA, Bridger JM, Boyle S, Perry P, Teague P, Bickmore WA. 1999. Differences in the localization and morphology of chromosomes in the human nucleus. *The Journal of Cell Biology* **145**: 1119–1131.
- Cubeñas-Potts C, Rowley MJ, Lyu X, Li G, Lei EP, Corces VG. 2017. Different enhancer classes in *Drosophila* bind distinct architectural proteins and mediate unique chromatin interactions and 3D architecture. *Nucleic Acids Res* **45**: 1714–1730.
- Cui Y, Bustamante C. 2000. Pulling a single chromatin fiber reveals the forces that maintain its higher-order structure. *Proc Natl Acad Sci USA* **97**: 127–132.
- Dekker J. 2008. Mapping in vivo chromatin interactions in yeast suggests an extended chromatin fiber with regional variation in compaction. *J Biol Chem* **283**: 34532–34540.
- Denker A, De Laat W. 2016. The second decade of 3C technologies: detailed insights into nuclear organization. *Genes & Development* **30**: 1357–1382.
- Di Stefano M, Paulsen J, Lien TG, Hovig E, Micheletti C. 2016. Hi-C-constrained physical models of human chromosomes recover functionally-related properties of genome organization. *Sci Rep* **6**: 35985.
- Di Stefano M, Rosa A, Belcastro V, di Bernardo D, Micheletti C. 2013. Colocalization of coregulated genes: a steered molecular dynamics study of human chromosome 19. *PLoS Comput Biol* **9**: e1003019.
- Dixon JR, Selvaraj S, Yue F, Kim A, Li Y, Shen Y, Hu M, Liu JS, Ren B. 2012. Topological domains in mammalian genomes identified by analysis of chromatin interactions. *Nature* 1–5.
- Duan Z, Andronescu M, Schutz K, Mcilwain S, Kim YJ, Lee C, Shendure J, Fields S, Blau CA, Noble WS. 2010. A three-dimensional model of the yeast genome. *Nature* **465**: 363–367.
- Dultz E, Tjong H, Weider E, Herzog M, Young B, Brune C, Müllner D, Loewen C, Alber F, Weis K. 2016. Global reorganization of budding yeast chromosome conformation in different physiological conditions. *The Journal of Cell Biology* **212**: 321–334.
- Eser U, Chandler-Brown D, Ay F, Straight AF, Duan Z, Noble WS, Skotheim JM. 2017. Form and function of topologically associating genomic domains in budding yeast. *Proceedings of the National Academy of Sciences* 201612256.
- Furlan-Magaril M, Várnai C, Nagano T, Fraser P. 2015. 3D genome architecture from populations to single cells. *Curr Opin Genet Dev* **31**: 36–41.
- Gibcus JH, Dekker J. 2013. The hierarchy of the 3D genome. *Mol Cell* **49**: 773–782.
- Gotta M, Laroche T, Gasser SM. 1999. Analysis of nuclear organization in *Saccharomyces cerevisiae*. *Meth Enzymol* **304**: 663–672.

- Gottschling DE, Aparicio OM, Billington BL, Zakian VA. 1990. Position effect at *S. cerevisiae* telomeres: reversible repression of Pol II transcription. *Cell* **63**: 751–762.
- Guelen L, Pagie L, Brassat E, Meuleman W, Faza MB, Talhout W, Eussen BH, de Klein A, Wessels L, De Laat W, et al. 2008. Domain organization of human chromosomes revealed by mapping of nuclear lamina interactions. *Nature* **453**: 948–951.
- Haaf T, Schmid M. 1991. Chromosome topology in mammalian interphase nuclei. *Experimental Cell Research* **192**: 325–332.
- Jones JE. 1924. On the Determination of Molecular Fields. II. From the Equation of State of a Gas. *Proceedings of the Royal Society A: Mathematical, Physical and Engineering Sciences* **106**: 463–477.
- Langowski J. 2006. Polymer chain models of DNA and chromatin. *Eur Phys J E Soft Matter* **19**: 241–249.
- Le Dily F, Baù D, Pohl A, Vicent GP, Serra F, Soronellas D, Castellano G, Wright RHG, Ballare C, Filion G, et al. 2014. Distinct structural transitions of chromatin topological domains correlate with coordinated hormone-induced gene regulation. *Genes & Development* **28**: 2151–2162.
- Lemaître C, Bickmore WA. 2015. Chromatin at the nuclear periphery and the regulation of genome functions. *Histochem Cell Biol* **144**: 111–122.
- Markaki Y, Gunkel M, Schermelleh L, Beichmanis S, Neumann J, Heidemann M, Leonhardt H, Eick D, Cremer C, Cremer T. 2010. Functional nuclear organization of transcription and DNA replication: a topographical marriage between chromatin domains and the interchromatin compartment. *Cold Spring Harb Symp Quant Biol* **75**: 475–492.
- Menon BB, Sarma NJ, Pasula S, Deminoff SJ, Willis KA, Barbara KE, Andrews B, Santangelo GM. 2005. Reverse recruitment: the Nup84 nuclear pore subcomplex mediates Rap1/Gcr1/Gcr2 transcriptional activation. *Proc Natl Acad Sci USA* **102**: 5749–5754.
- Mondoux MA, Scaife JG, Zakian VA. 2007. Differential Nuclear Localization Does Not Determine the Silencing Status of *Saccharomyces cerevisiae* Telomeres. *Genetics* **177**: 2019–2029.
- Mondoux MA, Zakian VA. 2005. Telomere Position Effect: Silencing Near the End. In *Telomeres*, pp. 261–316, Cold Spring Harbor Laboratory Press, Cold Spring Harbor, NY.
- Neurohr G, Naegeli A, Titos I, Theler D, Greber B, Diez J, Gabaldon T, Mendoza M, Barral Y. 2011. A midzone-based ruler adjusts chromosome compaction to anaphase spindle length. *Science* **332**: 465–468.
- Nora EP, Lajoie BR, Schulz EG, Giorgetti L, Okamoto I, Servant N, Piolot T, van Berkum NL, Meisig J, Sedat J, et al. 2012. Spatial partitioning of the regulatory landscape of the X-inactivation centre. *Nature* 1–5.



- O'Toole ET, Winey M, McIntosh JR. 1999. High-voltage electron tomography of spindle pole bodies and early mitotic spindles in the yeast *Saccharomyces cerevisiae*. *Mol Biol Cell* **10**: 2017–2031.
- Peric-Hupkes D, Meuleman W, Pagie L, Bruggeman SWM, Solovei I, Brugman W, Gräf S, Flicek P, Kerkhoven RM, van Lohuizen M, et al. 2010. Molecular maps of the reorganization of genome-nuclear lamina interactions during differentiation. *Mol Cell* **38**: 603–613.
- Phillips-Cremins JE, Corces VG. 2013. Chromatin insulators: linking genome organization to cellular function. *Mol Cell* **50**: 461–474.
- Plimpton S. 1995. Fast Parallel Algorithms for Short-Range Molecular Dynamics. *Journal of Computational Physics* **117**: 1–19.
- Pryde FE, Louis EJ. 1999. Limitations of silencing at native yeast telomeres. *EMBO J* **18**: 2538–2550.
- Rosa A, Everaers R. 2008. Structure and dynamics of interphase chromosomes. *PLoS Comput Biol* **4**: e1000153.
- Schmid M, Arib G, Laemmli C, Nishikawa J, Durussel T, Laemmli UK. 2006. Nup-PI: the nucleopore-promoter interaction of genes in yeast. *Mol Cell* **21**: 379–391.
- Sexton T, Yaffe E, Kenigsberg E, Bantignies F, Leblanc B, Hoichman M, Parrinello H, Tanay A, Cavalli G. 2012. Three-Dimensional Folding and Functional Organization Principles of the *Drosophila* Genome. *Cell* 1–15.
- Taddei A, Gasser SM. 2012. Structure and Function in the Budding Yeast Nucleus. *Genetics* **192**: 107–129.
- Taddei A, Schober H, Gasser SM. 2010. The Budding Yeast Nucleus. *Cold Spring Harb Perspect Biol* **2**: a000612–a000612.
- Taddei A, Van Houwe G, Hediger F, Kalck V, Cubizolles F, Schober H, Gasser SM. 2006. Nuclear pore association confers optimal expression levels for an inducible yeast gene. *Nature* **441**: 774–778.
- Taddei A, Van Houwe G, Nagai S, Erb I, van Nimwegen E, Gasser SM. 2009. The functional importance of telomere clustering: Global changes in gene expression result from SIR factor dispersion. *Genome Research* **19**: 611–625.
- Therizols P, Duong T, Dujon B, Zimmer C, Fabre E. 2010. Chromosome arm length and nuclear constraints determine the dynamic relationship of yeast subtelomeres. *Proceedings of the National Academy of Sciences* **107**: 2025–2030.
- Titos I, Ivanova T, Mendoza M. 2014. Chromosome length and perinuclear attachment constrain resolution of DNA intertwinings. *The Journal of Cell Biology* **206**: 719–733.
- Tjong H, Gong K, Chen L, Alber F. 2012. Physical tethering and volume exclusion determine higher-order genome organization in budding yeast. *Genome Research*

**25:** 875–888.

Wong H, Marie-Nelly H, Herbert S, Carrivain P, Blanc H, Koszul R, Fabre E, Zimmer C. 2012. A Predictive Computational Model of the Dynamic 3D Interphase Yeast Nucleus. *Current Biology* 1–10.

Wood AM, Van Bortle K, Ramos E, Takenaka N, Rohrbaugh M, Jones BC, Jones KC, Corces VG. 2011. Regulation of chromatin organization and inducible gene expression by a *Drosophila* insulator. *Mol Cell* **44**: 29–38.

Wyrick JJ, Holstege FC, Jennings EG, Causton HC, Shore D, Grunstein M, Lander ES, Young RA. 1999. Chromosomal landscape of nucleosome-dependent gene expression and silencing in yeast. *Nature* **402**: 418–421.

Zimmer C, Fabre E. 2011. Principles of chromosomal organization: lessons from yeast. *The Journal of Cell Biology* **192**: 723–733.

## Di Giovanni, Di Stefano Figure 1

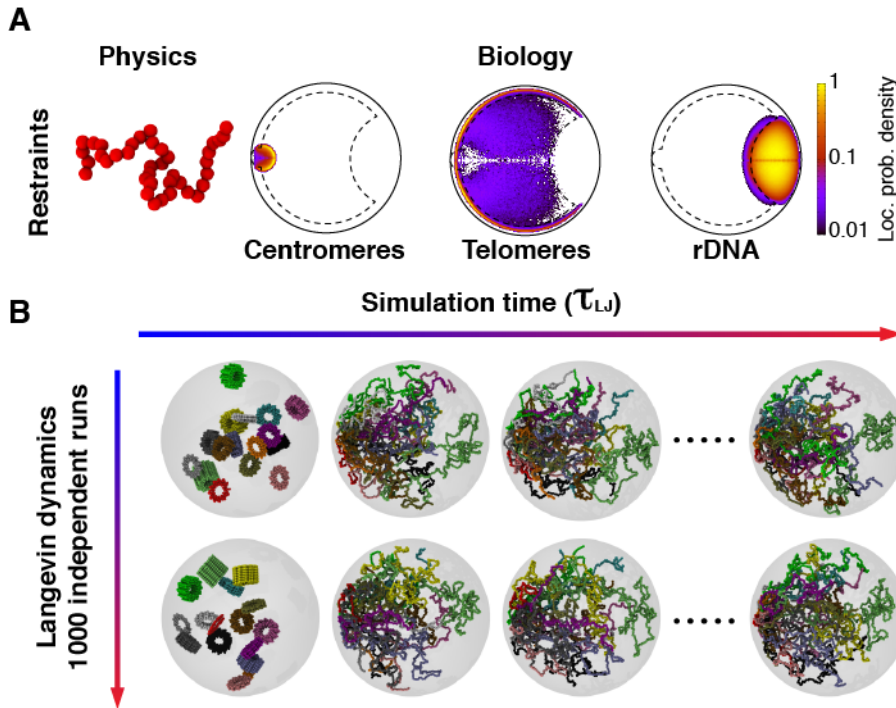

**Figure 1. Computational modelling of the haploid budding yeast nucleus in interphase.** (A) The 16 chromosomes were modelled as bead-and-spring chains with 30 nm beads each comprising 3.2 kb of DNA. The chains are confined to the nucleus (1  $\mu$ m radius sphere) and beads corresponding to centromeres were constrained in a sphere of radius 150 nm attached to the nuclear sphere. The rDNA was restrained in a region occupying 10% of the nuclear volume at the opposite site of the nucleus. The telomeres were attracted to the nuclear envelope to have higher propensity to occupy the nuclear periphery, a spherical shell closest to the nuclear envelope with a volume one third of the nucleus. (B) The ensemble of chromosomal polymer models, representing the genome-wide chromosome arrangement, were initialized as cylindrical solenoids of radius 150 nm. Next, the restraints on centromeres, rDNA, and telomeric particles were satisfied using a short preliminary run of Langevin dynamics, spanning  $60\tau_{LJ}$ , where the Lennard-Jones time  $\tau_{LJ}$  is the time unit of the simulations. Finally, the system is relaxed to sample steady state conformations (one every  $3,000\tau_{LJ}$ ) using a  $30,000\tau_{LJ}$  run of Langevin dynamics. Each strain was modelled 10,000 times.

Di Giovanni, Di Stefano Figure 2

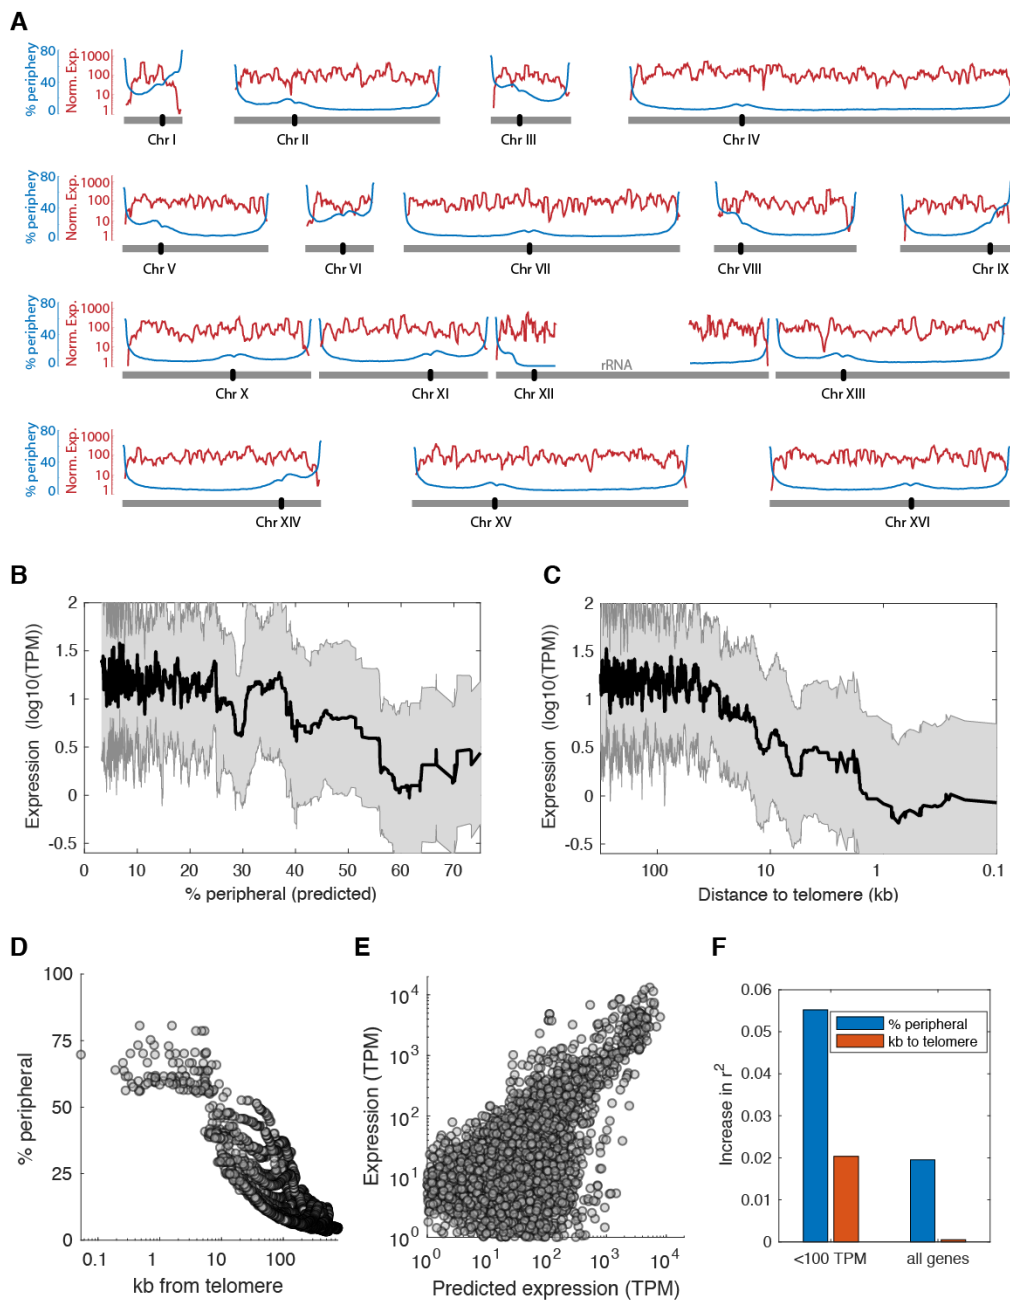

**Figure 2. Localization in the nuclear periphery is associated with lower expression.**

(A) mRNA expression (red) and predicted time spent in the nuclear periphery (blue) are shown for each chromatin bead along each of the 16 yeast chromosomes. (B-C) Median expression level for beads binned by distance to the telomere or binned by predicted % peripheral. (C) Predicted % peripheral is not perfectly correlated with distance from the telomere. (D) A linear model including codon bias, gene length, and % peripheral can predict steady-state mRNA levels. (E) In this model, including % peripheral (blue) has more predictive power than including distance from the telomere (red).

### Di Giovanni, Di Stefano, Figure 3

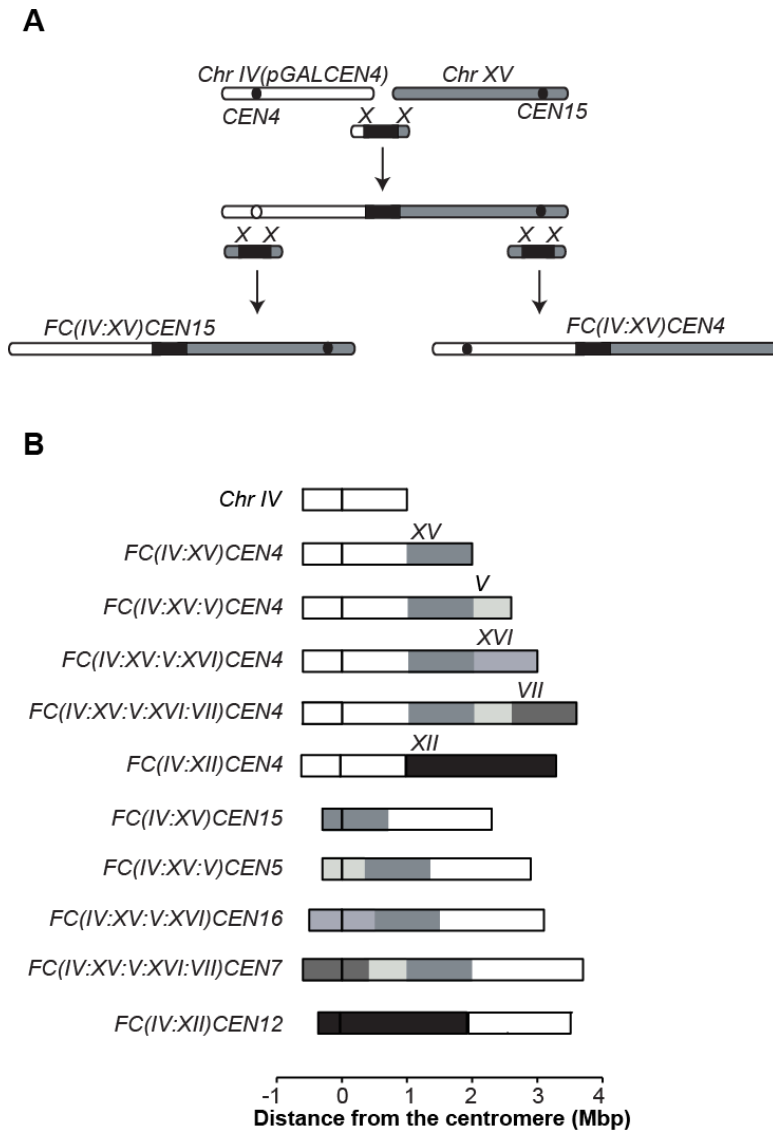

**Figure 3. Generation of fused chromosomes strains. (A)** The generation of fusion chromosomes (originally described in Neurohr et al. 2011 and Titos et al. 2014) starts with the integration of *pGAL1* sequence upstream of the centromere to be inactivated. Next, the chromosomes are fused by homologous recombination between a bridging PCR fragment and the telomeres of the chromosomes. Finally, the deletion of one of two centromeres and the excision of the *pGAL1* sequence, as appropriate, generates the *FC* strain. Black circle is the centromere, black rectangle is the selection marker. **(B)** Schemes of all the *FC* strains used in this work. Chromosome IV is shown for comparison.

Di Giovanni, Di Stefano Figure 4

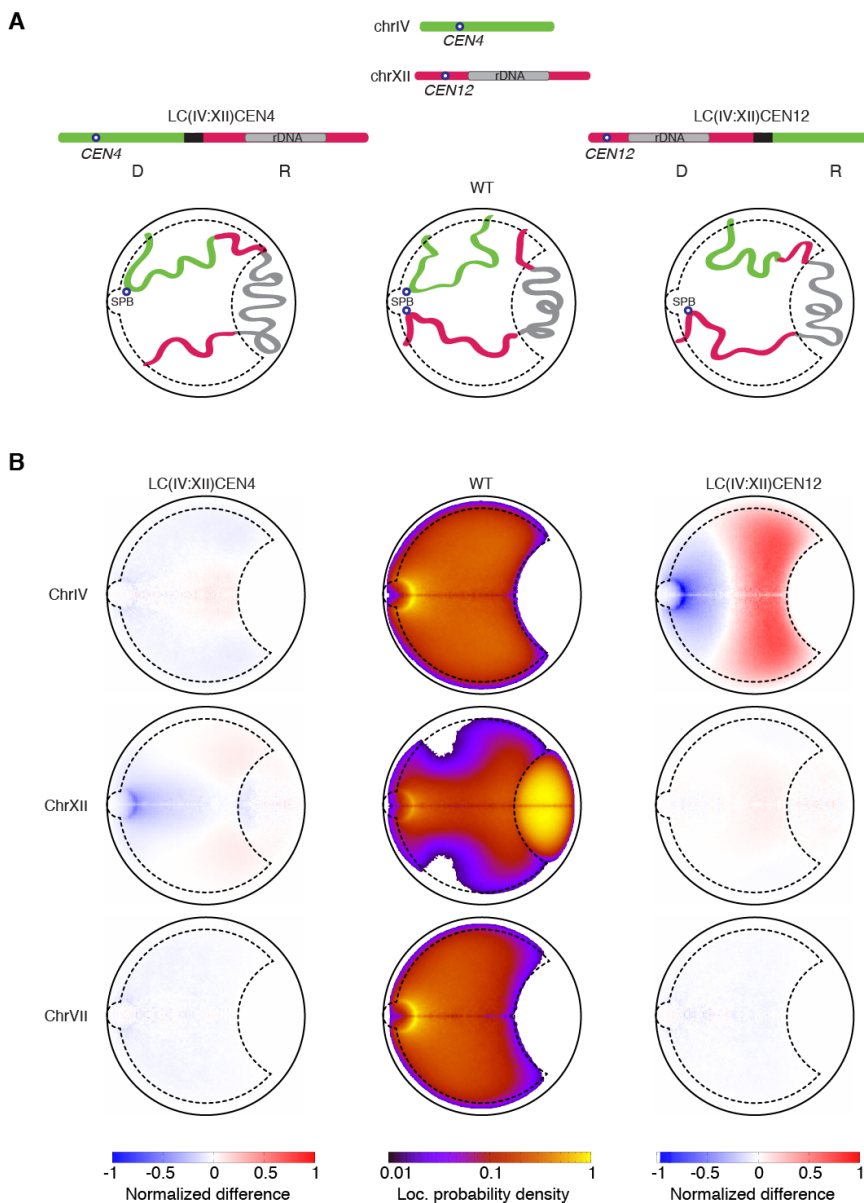

**Figure 4. The donor chromosomes are predicted to be strongly displaced in the nucleus.** **A.** Cartoon representations of the wild type, *FC(IV:XII)CEN4* and *FC(IV:XII)CEN12* strains. “Donor” and “recipient” chromosomes are labelled “D” and “R”, respectively. **B.** Predicted chromosome location probability densities for chromosomes IV, XII and VII in the wild-type strain (central column) and the *FC* strains *FC(IV:XII)CEN4* (left column) and *FC(IV:XII)CEN12* (right column), shown normalized by the wild type. The heat-maps show large differences in the positioning of the recipient and donor chromosomes, and almost no-difference in the nuclear organization of the largest non-fused one, chromosome VII.

Di Giovanni, Di Stefano Figure 5

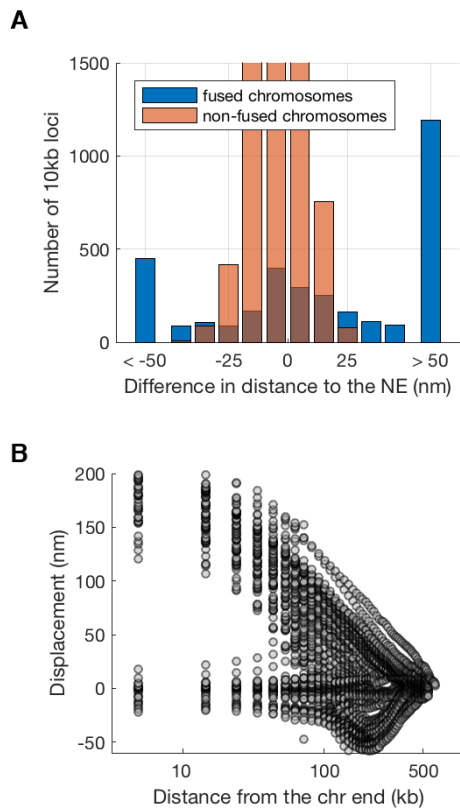

**Figure 5. Loci near the end of fused chromosomes are predicted to be displaced away from the nuclear periphery. (A)** The predicted displacement with respect to the nuclear envelop for loci in fused (blue) and non-fused (orange) chromosomes. **(B)** The predicted displacement with respect to the nuclear envelop for loci as a function of distance from the end of the chromosome in wild-type cells. Loci that are closer to the ends of the chromosomes exhibit a greater change away from the nuclear envelope.

Di Giovanni, Di Stefano Figure 6

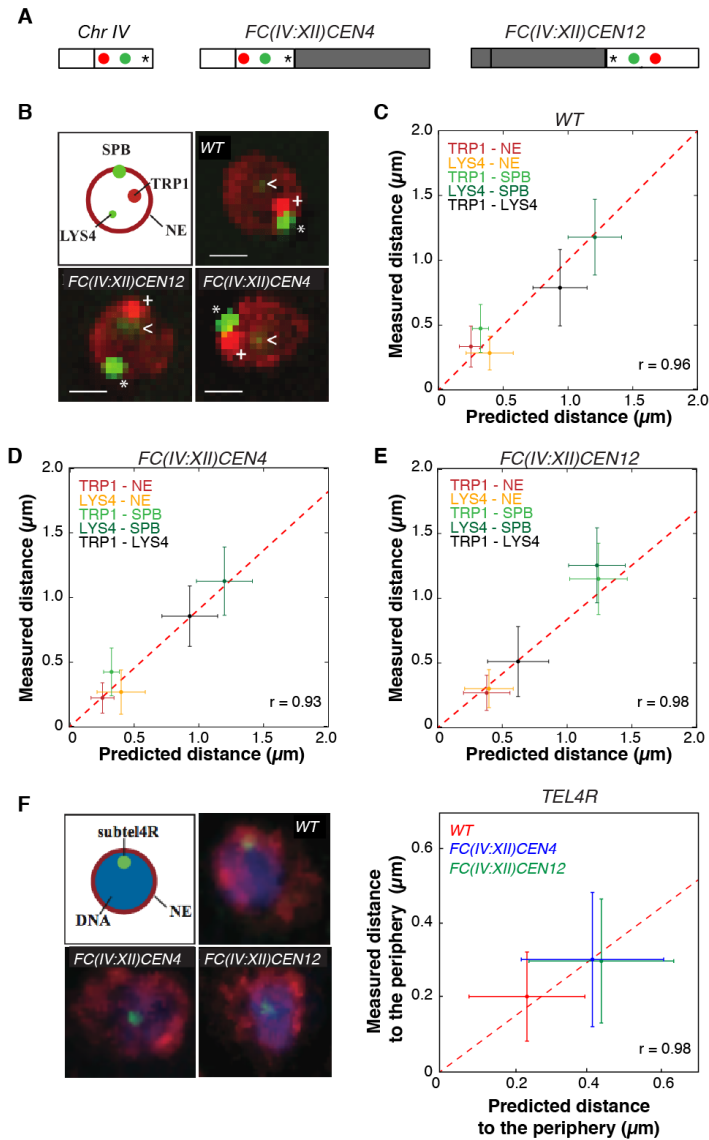

**Figure 6. Validation of the polymer models by live and fixed cell microscopy. (A)** Position of *TRP1* (red), *LYS4* (green), and *TEL4R* (asterisk) on chromosome 4 and its indicated FC derivatives. **(B)** Live cell microscopy of G1 cells of the indicated strains showing the localization of *TRP1* (red dot, marked with +), *LYS4* (faint green dot, arrowhead), the SPB (bright green dot, marked with an asterisk) and the nuclear periphery (red). **(C-E)** Correlation of measured and predicted distances between the indicated nuclear loci, the SPB and the nuclear periphery, in the indicated strains. **(F)** Fluorescence in situ hybridization and immuno-fluorescence of G1 cells of the indicated strains showing the localization of *TEL4R* (green dot) and the nuclear periphery (NE) (red). Graphs show the mean and standard deviations from 50 cells / strain in C-E, 52 cells / strain in F, and 10.000 independent simulations in C-F. Scale bar, 1 $\mu\text{m}$ .



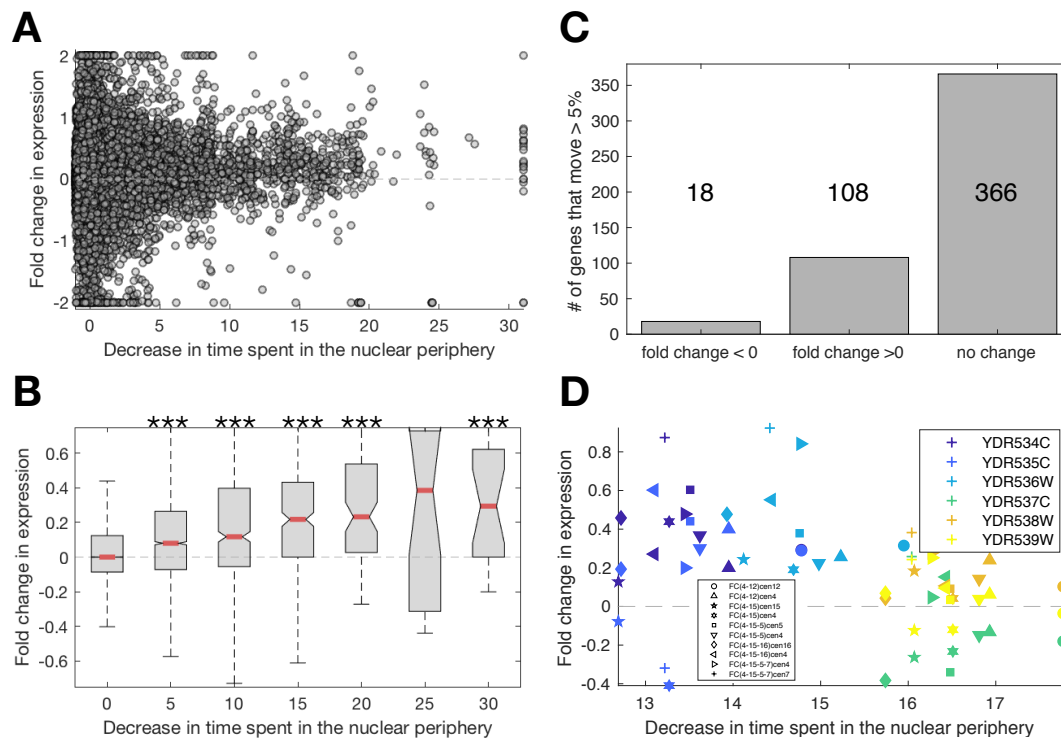

**Figure 7. Displacement away from the nuclear periphery increases expression. (A)** Shown for all genes and all strains are the fold change in expression and change in the predicted localization to the nuclear periphery. **(B)** The same data as in (A), with genes grouped by the predicted decrease in time spent in the periphery. Compared to genes whose localization does not change, groups of genes with significantly different changes in expression are marked with \*\*\* for when the p-value is <0.01 for a Kruskal-Wallis test with Tukey-Kramer multiple comparison correction. **(C)** The total number of genes that exhibit significant changes in expression due to changes in location. **(D)** Measured expression and predicted change in time spent in the nuclear periphery for the six genes around TEL4R. Colors mark genes, and symbols mark strains. This region is predicted to be ~15% less peripheral, and all genes save YDR537C increase in expression.

## SUPPLEMENTARY TABLES

**Supplementary Table S1: Deleted genes in *FC* strains**

| Fusion      | Chromosome arm | Deleted Regions |           | Deleted genes                                                                |
|-------------|----------------|-----------------|-----------|------------------------------------------------------------------------------|
|             |                | Start (bp)      | Stop (bp) |                                                                              |
| IV:XII      | IVR            | 1,516,999       | END       | IRC4, YDR541C, PAU10                                                         |
|             | XIIR           | 1,059,029       | END       | YLR460C, PAU4                                                                |
| IV:XV       | IVR            | 1,516,999       | END       | IRC4, YDR541C, PAU10,                                                        |
|             | XVR            | 1,068,611       | END       | PHR1, YOR385W, FRE5, FIT3, FIT2, YOR381W-A                                   |
| IV:XV:V     | IVR            | 1,516,999       | END       | IRC4, YDR541C, PAU10                                                         |
|             | XVR            | 1,068,611       | END       | PHR1, YOR385W, FRE5, FIT3, FIT2, YOR381W-A                                   |
|             | XVL            | BEGIN           | 5,301     | YOL164W-A, YOLWtau1, YOLCdelta1, YOL166C, YOL166C, YOL16                     |
|             | VR             | 561,108         | END       | PUG1, YER184C, SLO1, YERCdelta26, YER181C, FMP10, YERWdelta25, FAU1 /YER183C |
| IV:XV:XVI   | IVR            | 1,516,999       | END       | IRC4, YDR541C, PAU10                                                         |
|             | XVR            | 1,068,611       | END       | PHR1, YOR385W, FRE5, FIT3, FIT2, YOR381W-A                                   |
|             | XVL            | BEGIN           | 5,301     | YOL164W-A, YOLWtau1, YOLCdelta1, YOL166C, YOL166C, YOL16                     |
|             | XVIL           | BEGIN           | 22,026    | HSP32, YPL279C, YPL277C, YPL278C, FDH2                                       |
| IV:XV:V:VII | IVR            | 1,516,999       | END       | IRC4, YDR541C, PAU10                                                         |
|             | XVR            | 1,068,611       | END       | PHR1, YOR385W, FRE5, FIT3, FIT2, YOR381W-A                                   |
|             | XVL            | BEGIN           | 5,301     | YOL164W-A, YOLWtau1, YOLCdelta1, YOL166C, YOL166C, YOL16                     |
|             | VR             | 561,108         | END       | PUG1, YER184C, SLO1, YERCdelta26, YER181C, FMP10, YERWdelta25, FAU1 /YER183C |
| IV:XV:V:VII | VL             | BEGIN           | 13,208    | YEL077, YEL076, YEL075                                                       |
|             | VIII           | BEGIN           | 2,088     | none                                                                         |

**Supplementary Table S2.** Parameters of the polymer models.

| <b>Parameter</b>                           | <b>Value</b> | <b>Reference</b> |
|--------------------------------------------|--------------|------------------|
| Number of chromosomes                      | 16           | 1                |
| Chromosome persistence length              | 61.7 nm      | 2                |
| Chromosome persistence length (last 30kb)  | 195.0 nm     | 3                |
| Nuclear diameter                           | 2 $\mu$ m    | This study       |
| Particle DNA content                       | 3.2 kb       | 3                |
| Diameter of euchromatin segments           | 30 nm        | 3                |
| Number of repeats of the 9.1kb rDNA region | 102          | 1                |
| Chains can cross each other                | No           | 4                |

1. Cherry JM, et al. (1997) Genetic and physical maps of *Saccharomyces cerevisiae*. *Nature* 387 (6632 Suppl):67-73

2. Tjong et al 2012

3. Bystricky et al 2014

4. Rosa and Everaers 2008

**Supplementary Table S3.** Number of particles per chromosome chain in the polymer models.

| <b>Chromosome</b> | <b># of particles</b> |
|-------------------|-----------------------|
| I                 | 72                    |
| II                | 254                   |
| III               | 99                    |
| IV                | 479                   |
| V                 | 180                   |
| VI                | 84                    |
| VII               | 341                   |
| VIII              | 176                   |
| IX                | 138                   |
| X                 | 233                   |
| XI                | 208                   |
| XII               | 627                   |
| XIII              | 289                   |
| XIV               | 245                   |
| XV                | 341                   |
| XVI               | 296                   |

## SUPPLEMENTARY FIGURES

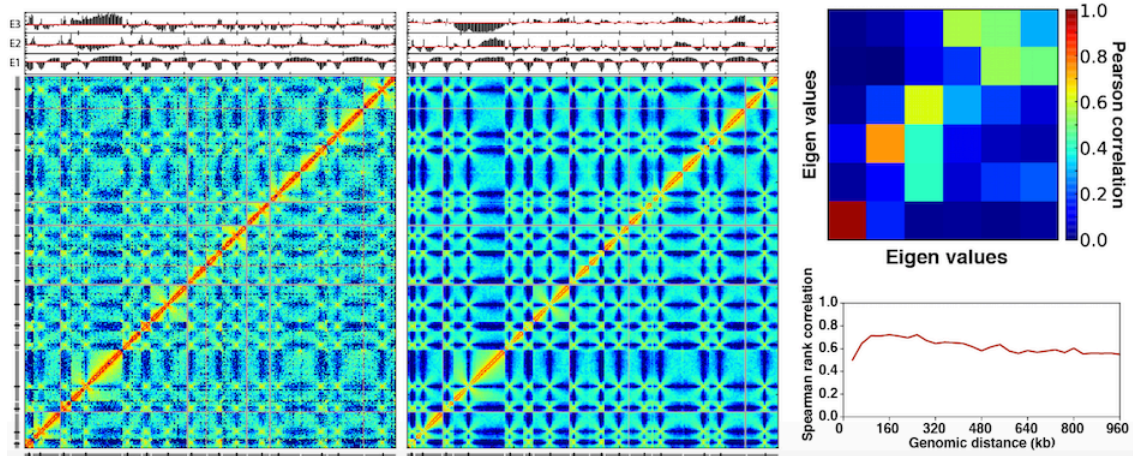

**Supplementary Fig. S1. Comparison of the experimental and predicted contact maps.** DNA contact maps from the models (right matrix) and that obtained experimentally (Duan et al. 2010). Spectral decompositions of the maps shows significant internal correlations up the first 6th eigenvalues (Imakaev, M. *et al.* Iterative correction of Hi-C data reveals hallmarks of chromosome organization. *Nat. Methods* **9**, 999 (2012) doi:10.1038/nmeth.2148). Correlations between elements grouped by genomic distance are significant up to the typical length of a budding yeast chromosome arm.

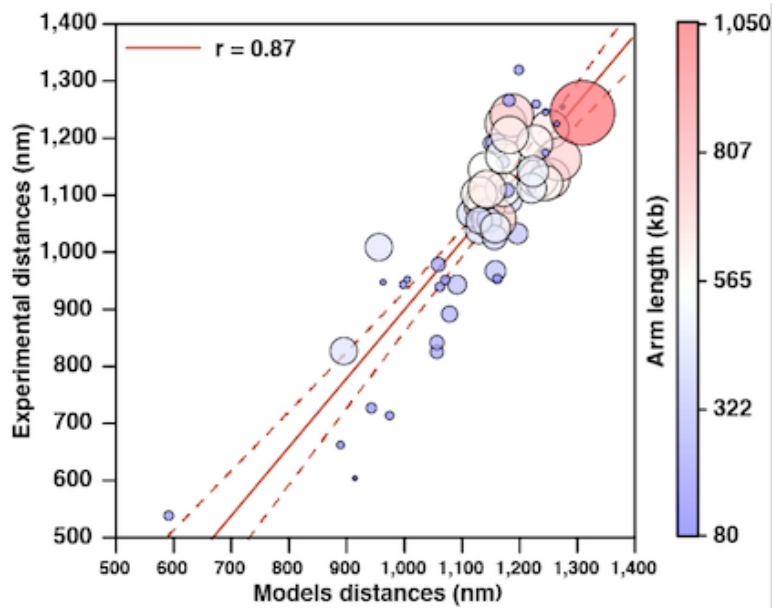

**Supplementary Fig. S2.** Correlation between measured median telomere-telomere distances in (Therizols et al. 2010). Analogous computations done on the wild type models show a significant agreement between models and experimental results.

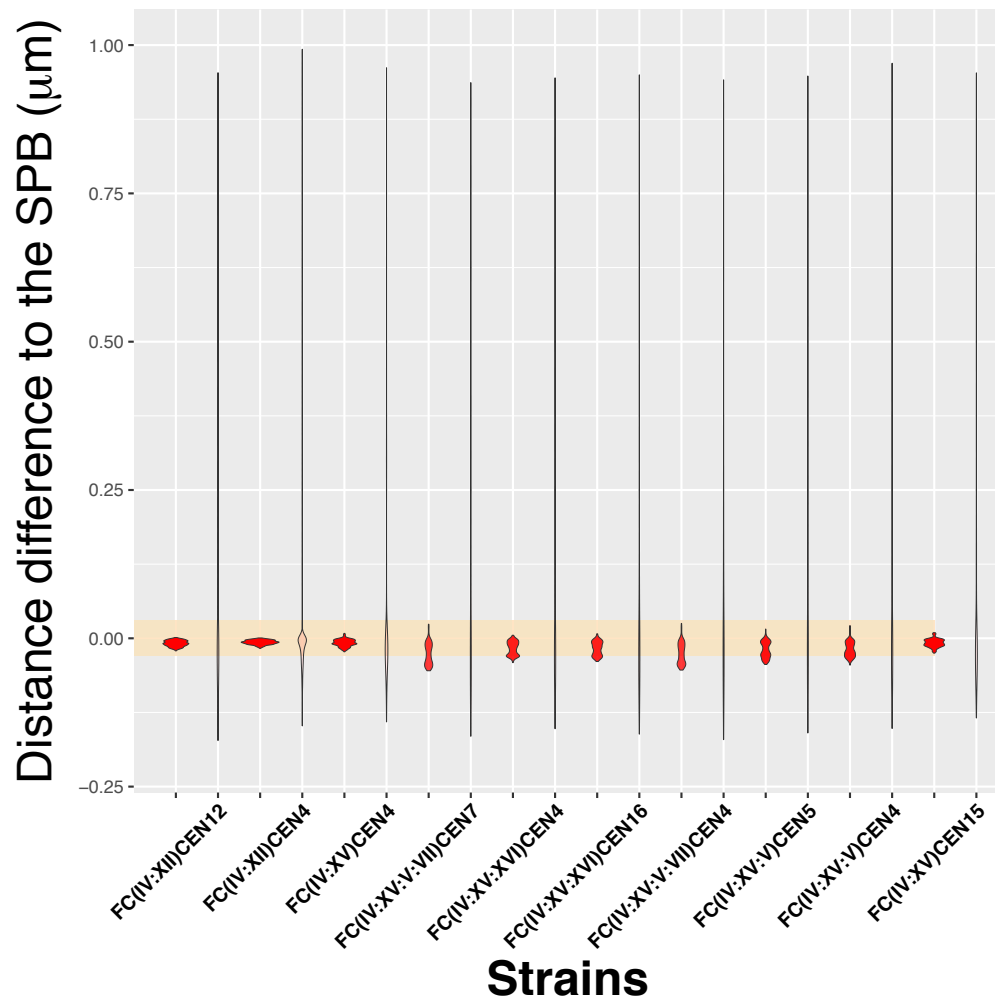

**Supplementary Fig. S3:** Displacement of fused chromosomes away from the SPB. Two distributions of the difference in average distance away from the SPB are shown for loci in *FC* strains with respect to the wildtype, including the non-fused chromosomes (left) and the fused chromosomes (right). The yellow reference area indicates the interval between -50 nm and 50 nm. Only fused “donor” chromosomes show displacements away from the SPB larger than 50 nm.

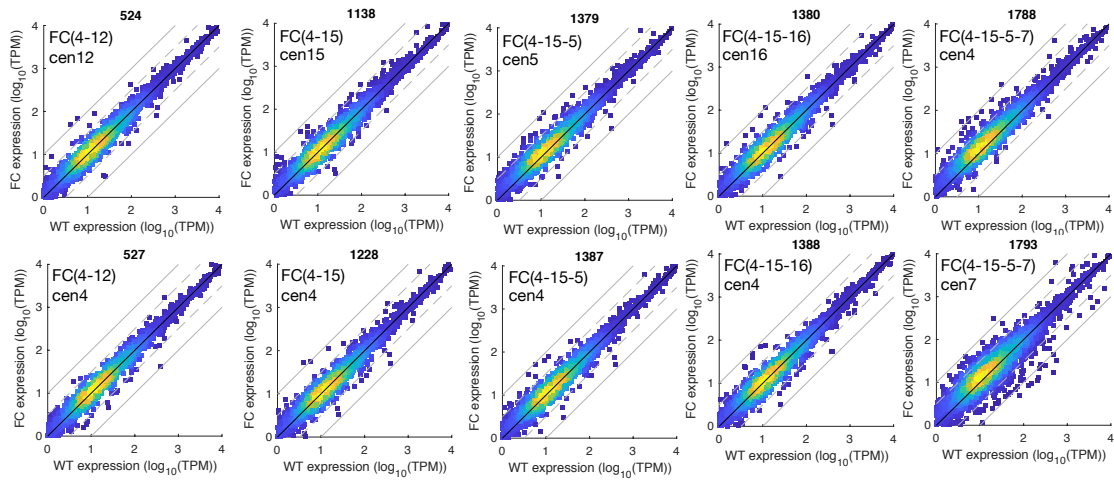

**Supplementary Fig. S4. FC strains do not exhibit large-scale changes in gene expression.** Expression levels in each FC strain are compared to expression in the WT-strain. Solid grey lines show a fold change of 1.0, dashed grey lines show a fold change of 0.5.
